# Supplementary material
Source: publisher site journal article supplement (https://www.dovepress.com/get_supplementary_file.php?f=423022.docx)
Supplement: Supplementary file 1 [file get_supplementary_file.php]

**Supplementary Materials**

**Table S1. The identification of constituents of Jin Gu Lian capsule (JGL)** **by UPLC-Q-TOF-MS.**

| **Peak no.** | **Name** | **Formula** | **Exact m/z** | **Observed m/z** | **MS2 ions** | **RT (min)** | **PPM** | **Extracting ions** | **References** |
| --- | --- | --- | --- | --- | --- | --- | --- | --- | --- |
| 1 | Betaine | C5H11NO2 | 117.0788 | 118.0868 | 118.0853 | 0.80 | -5.9 | [M+H]+ | (Zhou et al., 2022) |
| 2 | 2,7-dihydroxycadalene | C15H18O2 | 230.1306 | 253.1199 | - | 1.08 | -2.0 | [M+Na]+ | (Zhang et al., 2013) |
| 3 | Anabasine | C10H14N2 | 162.1157 | 163.1235 | 146.0590, 134.0535, 120.0802 | 1.13 | -3.7 | [M+H]+ | (Wei et al., 2020) |
| 4 | Fumaric acid | C4H4O4 | 116.0110 | 115.0019 | - | 1.26 | -8.4 | [M-H]- | (Zhou et al., 2022) |
| 5 | Gallic acid | C7H6O5 | 170.0214 | 169.0126 | 125.0224 | 1.51 | -6.5 | [M-H]- | (Zhou et al., 2022) |
| 6 | Venoterpine | C9H11NO | 149.0841 | 150.0919 | 108.0453 | 1.61 | -3.3 | [M+H]+ | (Zhu et al., 1996) |
| 7 | Syringic acid | C9H10O5 | 198.0528 | 199.0606 | 166.9763，140.0670，123.0436 | 1.99 | -1.5 | [M+H]+ | (Zhou et al., 2022) |
| 7 | Syringic acid | C9H10O5 | 198.0528 | 197.0432 | 182.0078，166.0257，138.4255，123.0432 | 2.08 | -5.6 | [M-H]- | (Liu et al., 2022) |
| 8 | Caffeic acid | C9H8O4 | 180.0422 | 181.0499 | 163.0390，145.0488，135.0430 | 2.36 | -1.1 | [M+H]+ | (Zhou et al., 2022) |
| 8 | Caffeic acid | C9H8O4 | 180.0421 | 179.0333 | 135.0436, 107.0501 | 4.25 | -7.3 | [M-H]- | (Zhou et al., 2022) |
| 9 | Vanillic acid | C8H8O4 | 168.0423 | 167.0334 | 152.0097，123.0434 | 2.41 | -5.4 | [M-H]- | (Liu et al., 2023) |
| 10 | Protocatechuic acid | C7H6O4 | 154.0265 | 153.0171 | 135.0432, 109.0276 | 2.71 | -6.5 | [M-H]- | (Zhou et al., 2022) |
| 11 | Glucosyringic acid | C15H20O10 | 360.1056 | 359.0966 | 197.0437，153.0535 | 2.85 | -3.3 | [M-H]- | (Yue et al., 2016) |
| 12 | Neochlorogenic acid | C16H18O9 | 354.0951 | 353.0866 | 191.0545，179.0332，135.0434 | 3.02 | -0.6 | [M-H]- | (Wang et al., 2019) |
| 13 | 7-O-β-Glucopyranosylsalicin | C19H28O12 | 448.1581 | 447.1504 | 285.0626，123.0435 | 3.10 | 0.2 | [M-H]- | (Zhang et al., 2009) |
| 14 | Salidroside | C14H20O7 | 300.1206 | 299.1123 | 179.0323，161.0432，137.0585，131.0336，113.0227，101.0227 | 3.35 | -2.7 | [M-H]- | (Zhou et al., 2022) |
| 15 | Loganate | C16H24O10 | 376.1364 | 375.1291 | 169.0837, 151.0375, 113.0228 | 3.46 | -1.1 | [M-H]- | (Zhou et al., 2022) |
| 16 | 4-Hydroxybenzoic acid | C7H6O3 | 138.0317 | 137.0228 | - | 3.61 | -8.0 | [M-H]- | (Wang et al., 2019) |
| 17 | Chlorogenic acid | C16H18O9 | 354.0948 | 353.0872 | 191.0545, 179.0336, 161.0226, 127.0387 | 3.98 | 0.8 | [M-H]- | (Zhou et al., 2022) |
| 18 | Esculetin | C9H6O4 | 178.0266 | 177.0182 | 133.0273, 105.0325 | 4.15 | -5.6 | [M-H]- | (Zhou et al., 2022) |
| 19 | Fraxin | C16H18O10 | 370.0898 | 369.0803 | 207.0273, 192.0040, 163.0381 | 4.23 | -3.8 | [M-H]- | (Zhou et al., 2022) |
| 20 | Tangeretin | C20H20O7 | 372.1210 | 373.1274 | 343.1178，325.1081 | 4.48 | -3.5 | [M+H]+ | (Zhou et al., 2022) |
| 21 | (+)-Lyoniresinol 3a-O-β-D-glucopyranoside | C28H38O13 | 582.2312 | 605.2188 | 268.0696，267.1199，249.1121 | 4.54 | -1.3 | [M+Na]+ | (Yue et al., 2016) |
| 22 | Lariciresinol 4-O-glucoside | C26H34O11 | 522.2100 | 521.2014 | 359.1483， 344.1248，329.1017, 313.1052 | 4.60 | -2.7 | [M-H]- | (Zhou et al., 2022) |
| 23 | 5-O-p-coumaroyl quinic acid | C16H18O8 | 338.1002 | 337.0912 | 191.0546，163.0588 | 4.65 | -3.0 | [M-H]- | (Wang et al., 2019) |
| 24 | Vanillin | C8H8O3 | 152.0473 | 153.0552 | 125.0606，111.0416 | 4.96 | -4.6 | [M+H]+ | (Zhou et al., 2022) |
| 25 | Methyl chlorogenate | C17H20O9 | 368.1107 | 367.1025 | 179.0328，161.0226，135.0436，134.0351 | 4.99 | -2.2 | [M-H]- | (Liu et al., 2022) |
| 26 | kaempferol | C15H10O6 | 286.2400 | 287.0551 | 258.0581, 241.0814, 213.0182, 165.0689 | 5.05 | -2.4 | [M+H]+ | (Wang et al., 2019) |
| 27 | Pimelic acid | C7H12O4 | 160.0736 | 159.0641 | 141.0548, 115.0752 | 5.09 | -8.8 | [M-H]- | (Zhou et al., 2022) |
| 28 | (+)-Lyoniresin-4-yl-β-D-glucopyranoside | C28H38O13 | 582.2217 | 581.2227 | 419.1684，404.1453，233.0813 | 5.39 | -0.9 | [M-H]- | (Liu et al., 2022) |
| 29 | Rutin | C27H30O16 | 610.1533 | 609.1454 | 300.0262， 271.0230， 255.0279， 178.9978 | 5.56 | 2.6 | [M-H]- | (Zhou et al., 2022) |
| 30 | (11S)-6-Hydroxy-5-(11-hydroxypropan-12-yl)-3,8-dimethyl-2H-chromen-2-one | C14H16O4 | 248.1049 | 249.1122 | 191.0710，163.0387 | 5.77 | -2.0 | [M+H]+ | (Zhang et al., 2015) |
| 31 | Gaultheroside A | C27H36O12 | 552.2206 | 551.2123 | 389.1237 | 5.80 | -0.2 | [M-H]- | (Zhou et al., 2022) |
| 32 | (+)-Lyoniresinol | C22H28O8 | 420.1784 | 419.1692 | 404.1473，389.1238，373.1281 | 5.93 | -2.1 | [M-H]- | (Wang et al., 2019) |
| 33 | Calceolarioside B | C23H26O11 | 478.1473 | 477.1389 | 315.1064，179.0330，161.0227，135.0427 | 6.03 | -1.7 | [M-H]- | (Zhou et al., 2022) |
| 34 | (-)-catechin | C15H14O6 | 290.0790 | 313.0709 | 249.1118，207.0631，123.0443 | 6.14 | 6.7 | [M+Na]+ | (Zhou et al., 2022) |
| 35 | Isochlorogenic acid B | C25H24O12 | 516.1265 | 515.1191 | 353.0865，191.0542，179.0332，173.0438，161.0228，135.0432 | 6.19 | 0.8 | [M-H]- | (Zhou et al., 2022) |
| 36 | 9-(2,3-dihydroxypropoxy)-9-oxononanoic acid | C12H22O6 | 262.1415 | 261.1325 | 187.0954，169.0851，143.0684，125.0955 | 6.47 | -5.7 | [M-H]- | (Zhou et al., 2022) |
| 37 | Azelaic acid | C9H16O4 | 188.1047 | 187.0967 | 169.0883，143.0334 | 6.89 | -5.9 | [M-H]- | (Zhou et al., 2022) |
| 38 | Feruloyltyramine | C18H19NO4 | 313.1312 | 312.1248 | 297.1026，253.0876，148.0508，135.0432 | 7.70 | -4.5 | [M-H]- | (Zhou et al., 2022) |
| 39 | Mansonone H | C15H14O4 | 258.0892 | 259.0965 | 231.0865，230.0770，215.1768 | 9.82 | -1.9 | [M+H]+ | (Zhang et al., 2015) |
| 40 | Medicagenic acid | C30H46O6 | 502.3290 | 501.3211 | 483.3105，439.3194 | 11.25 | -1.0 | [M-H]- | (Zhou et al., 2022) |
| 41 | Ursolic acid | C30H48O3 | 456.3603 | 457.3676 | 439.3567，411.3607，203.1783，191.1786 | 12.02 | -3.7 | [M+H]+ | (Xu, 2015) |
| 42 | scheffleside K | C41H64O14 | 780.4296 | 779.4246 | 629.3685，471.3465 | 12.29 | 3.6 | [M-H]- | (Wang et al., 2019) |
| 43 | Quillaic acid | C30H46O5 | 486.3339 | 485.3265 | 467.3156，439.3204，423.3260，229.0864 | 14.66 | 0.0 | [M-H]- | (Zhou et al., 2022) |

**Reference:**

Zhou Z.Y., Huang Y., Xiao J.C., Liu H., Wang Y.L., Gong Z.P., *et al*. (2022). Chemical profiling and quantification of multiple components in Jin-Gu-Lian capsule using a multivariate data processing approach based on UHPLC-Orbitrap Exploris 240 MS and UHPLC-MS/MS. *J Sep Sci,* 45**,** 1282-1291.

Wei X., Yang J., Dai Z., Yu H.F., Ding C.F., Khan A., *et al*. (2020). Antitumor pyridine alkaloids hybrid with diverse units from Alangium chinense. *Tetrahedron Letters,* 61.

Zhu M., Bowery N.G., Greenngrass P.M., and Phillipson J. D. (1996). Application of radioligand receptor binding assays in the search for CNS active principles from Chinese medicinal plants. *Journal of Ethnopharmacology,* 54**,** 153-164.

Liu J.L., Ren W., Yang S.J., Tang R., Mao L.S., and Shui P.X.(2022). Study on the effective ingredients and potential mechanism of Sargentodoxa cuneata in the treatment of cerebral infarction based on UPLC-HR-MS and network pharmacology. *Nat Prod Res Dev* 34(03):436-447.

Yue Y.D.(2016). Chemical Constituents and Bioactivities of Swertia bimaculata and Alangium chinense. Huazhong University of Science and Technology.

Wang X., Li X., Wang R., Wang L., Fan S., Wang X., *et al*. (2019). Human gastrointestinal metabolism of the anti-rheumatic fraction of Dianbaizhu (Gaultheria leucocarpa var. yunnanensis) in vitro: Elucidation of the metabolic analysis in gastric juice, intestinal juice and human intestinal bacteria by UPLC-LTQ-Orbitrap-MS(n) and HPLC-DAD. *J Pharm Biomed Anal,* 175**,** 112791.

Zhang X.H., Liu S.S., and Xuan L.J. (2009). Cyclopentenylglycines and other constituents from Alangium chinense. *Biochemical Systematics and Ecology,* 37**,** 214-217.

Zhang Y., Liu Y. B., Li Y., Li L., Ma S.G., Qu J., *et al*. (2015). Terpenoids from the roots of Alangium chinense. *J Asian Nat Prod Res,* 17**,** 1025-38.

Zhang Y., Liu Y.B., Li Y., Ma S.G., Li L., Qu J., et al. (2013). Sesquiterpenes and alkaloids from the roots of Alangium chinense. J Nat Prod, 76, 1058-63.

Xu J. (2015). Study on chemical constituents of Hantaensis leaves. Hunan University of Chinese Medicine.

**Table S2. Chemical components of each herb in Jin-Gu-Lian capsules**

| **Herbs** | **Chemicals components** |
| --- | --- |
| *Alangium chinense* | Anabasine |
| *Alangium chinense* | (2R)-N-Hydroxybenzylanabasine |
| *Alangium chinense* | Methyl nigakinone |
| *Alangium chinense* | (2S, 7S, 11S)-(8E,12Z)-2, 10-dihydroxypellialactone |
| *Alangium chinense* | (2S,4S,7S,11S)-(8E,12Z)-2, 4,10-trihydroxy-pellialactone |
| *Alangium chinense* | (11S)-6-hydroxy-5-(11-hydroxypropan-12-yl)-3,8-dimethyl-2H-chromen-2-one |
| *Alangium chinense* | 3S,4R,5S,8S,10S-tetrahydroperezinone |
| *Alangium chinense* | 3S,4R,5S,8S,10S,11R-12-hydroxy-tetrahydroperezinone |
| *Alangium chinense* | (5S, 8R)-2-hydroxy-3,8- dimethyl-5-vinyl-5,6,7,8-tetrahydronaphthalene-1,4-dione |
| *Alangium chinense* | (6Z, 9S)-9-hydroxy-4,6-megastigmadien-3-one |
| *Alangium chinense* | (6S,9R)-roseoside |
| *Alangium chinense* | Platanionoside G |
| *Alangium chinense* | Mansorin G |
| *Alangium chinense* | 2,7-Dihydroxy-4-isopropyl-6-methylnaphthalene-1-carboxylic acid methyl ester |
| *Alangium chinense* | 2,7-dihydroxycadalene |
| *Alangium chinense* | 7-Hydroxycadalene |
| *Alangium chinense* | (5S,8R)-3,8-dimethyl-5-propan-2-yl-5,6,7,8-tetrahydronaphthalene-1,2-diol |
| *Alangium chinense* | Uracil |
| *Alangium chinense* | Uridine |
| *Alangium chinense* | Thymidine |
| *Alangium chinense* | 6-(Hydroxymethyl)pyridin-3-ol |
| *Alangium chinense* | 8-hydroxy-3,6,9-trimethyl-7H-benzo [de] quinolin-7-one |
| *Alangium chinense* | 8-hydroxy-3-hydroxymethyl-6,9-dimethyl-7H-benzo [de] Isoquinolin-7-one |
| *Alangium chinense* | venoterpine |
| *Gaultheria leucocarpa var. yunnanensis* | Juglanin |
| *Gaultheria leucocarpa var. yunnanensis* | Juglone |
| *Gaultheria leucocarpa var. yunnanensis* | Leptostachyol acetate |
| *Gaultheria leucocarpa var. yunnanensis* | (2S)-7-(iodomethyl)-2-phenyl-6-(trifluoromethyl)-4-oxa-1-azabicyclo[4.2.0]octan-5-one |
| *Gaultheria leucocarpa var. yunnanensis* | Phrymarolin I |
| *Gaultheria leucocarpa var. yunnanensis* | Vanillic acid |
| *Gaultheria leucocarpa var. yunnanensis* | Myricetin |
| *Gaultheria leucocarpa var. yunnanensis* | Methyl salicylate |
| *Gaultheria leucocarpa var. yunnanensis* | Methyl salicylate 2-O-β-D-glucopyranoside |
| *Gaultheria leucocarpa var. yunnanensis* | Quercetin |
| *Gaultheria leucocarpa var. yunnanensis* | Eucalyptin |
| *Gaultheria leucocarpa var. yunnanensis* | (+)-catechin |
| *Gaultheria leucocarpa var. yunnanensis* | Ferulic acid |
| *Gaultheria leucocarpa var. yunnanensis* | Chlorogenic acid |
| *Gaultheria leucocarpa var. yunnanensis* | (+)-lyoniresinol |
| *Gaultheria leucocarpa var. yunnanensis* | Scopoletin |
| *Gaultheria leucocarpa var. yunnanensis* | 5-Methoxyisolariciresinol |
| *Gaultheria leucocarpa var. yunnanensis* | Gaultheroside A |
| *Gaultheria leucocarpa var. yunnanensis* | Gaultherin B |
| *Gaultheria leucocarpa var. yunnanensis* | Gaultherin C |
| *Gaultheria leucocarpa var. yunnanensis* | Gaultherin D |
| *Gaultheria leucocarpa var. yunnanensis* | Gaultheronoterpene |
| *Gaultheria leucocarpa var. yunnanensis* | Gaultheric acid |
| *Gaultheria leucocarpa var. yunnanensis* | Paeoniflorin |
| *Gaultheria leucocarpa var. yunnanensis* | Roseoside |
| *Gaultheria leucocarpa var. yunnanensis* | Acetylsyringic acid |
| *Gaultheria leucocarpa var. yunnanensis* | Fmoc-2-amino-3,4,5-trimethoxy-benzoic acid |
| *Gaultheria leucocarpa var. yunnanensis* | diacetylgentisic acid |
| *Gaultheria leucocarpa var. yunnanensis* | Methyl 2,5-dihydroxybenzoate |
| *Gaultheria leucocarpa var. yunnanensis* | 3,4-dimethoxycinnamic acid |
| *Gaultheria leucocarpa var. yunnanensis* | Catechol |
| *Gaultheria leucocarpa var. yunnanensis* | 3-Hydroxybenzoic acid |
| *Gaultheria leucocarpa var. yunnanensis* | 4-Hydroxybenzoic acid |
| *Gaultheria leucocarpa var. yunnanensis* | Ethyl salicylate |
| *Gaultheria leucocarpa var. yunnanensis* | Eugenol |
| *Gaultheria leucocarpa var. yunnanensis* | Citronellal |
| *Gaultheria leucocarpa var. yunnanensis* | Phenyl salicylate |
| *Gaultheria leucocarpa var. yunnanensis* | kaempferol |
| *Gaultheria leucocarpa var. yunnanensis，Sargentodoxa cuneata,*  *Heptapleurum leucanthum* | Protocatechuic acid |
| *Heptapleurum leucanthum* | Hederagenin |
| *Heptapleurum leucanthum* | Maslinic acid |
| *Heptapleurum leucanthum* | Pennogenin |
| *Heptapleurum leucanthum* | Diosgenin |
| *Heptapleurum leucanthum* | (2α,3β)-2,3-Dihydroxy-urs-12-en-28-oic acid |
| *Heptapleurum leucanthum* | Mucic acid |
| *Heptapleurum leucanthum* | Schekwangsienside A |
| *Heptapleurum leucanthum* | 22α-hydroxyoleanolic acid |
| *Heptapleurum leucanthum* | 21β-hydroxy-3-oxo-olean-12-en-28-oic acid |
| *Heptapleurum leucanthum* | Scheffleraside I |
| *Heptapleurum leucanthum* | Oleanoic acid 28-O-β-D-glucopyranoside |
| *Heptapleurum leucanthum* | 2α,3β-dihydroxy-urs-12-en-28-oic acid |
| *Heptapleurum leucanthum* | Fumaric acid |
| *Heptapleurum leucanthum,*  *Gaultheria leucocarpa var. yunnanensis* | Ursolic acid |
| *Psammosilene tunicoides* | tunicoidine B |
| *Psammosilene tunicoides* | tunicoidine D |
| *Psammosilene tunicoides* | Alanine anhydride |
| *Psammosilene tunicoides* | 3-Isopropyl-6-methyl-2,5-dioxopiperazine |
| *Psammosilene tunicoides* | 3-Isobutyl-6-methyl-2,5-piperazinedione |
| *Psammosilene tunicoides* | 3-butan-2-yl-6-methylpiperazine-2,5-dione |
| *Psammosilene tunicoides* | Tunicoside F |
| *Psammosilene tunicoides* | Tunicoside G |
| *Psammosilene tunicoides* | Tunicoside H |
| *Psammosilene tunicoides* | Tunicoside I |
| *Psammosilene tunicoides* | Tunicoside K |
| *Psammosilene tunicoides* | Tunicoside L |
| *Psammosilene tunicoides* | Tunicoidol A |
| *Psammosilene tunicoides* | Tunicoidol C |
| *Psammosilene tunicoides* | 2-coniferylglycerol ethe |
| *Psammosilene tunicoides* | Quillaic Acid |
| *Psammosilene tunicoides* | Psammosilenin A |
| *Sargentodoxa cuneata* | syringaresnol diglucoside_qt |
| *Sargentodoxa cuneata* | Sitogluside |
| *Sargentodoxa cuneata* | Physcion |
| *Sargentodoxa cuneata* | Dihydroguaiaretic acid |
| *Sargentodoxa cuneata* | Emodin |
| *Sargentodoxa cuneata* | Osmanthuside B |
| *Sargentodoxa cuneata* | salidroside |
| *Sargentodoxa cuneata* | 2-(4-hydroxyphenyl)ethyl (E)-3-(4-hydroxyphenyl)prop-2-enoate |
| *Sargentodoxa cuneata,*  *Gaultheria leucocarpa var. yunnanensis* | Glucosyringic acid |
| *Sargentodoxa cuneata,*  *Gaultheria leucocarpa var. yunnanensis* | (-)-catechin |
| *Sargentodoxa cuneata,*  *Heptapleurum leucanthum* | β-sitosterol |
| UPLC-Q-TOF-MS analysis | Betaine |
| UPLC-Q-TOF-MS analysis | Tangeretin |
| UPLC-Q-TOF-MS analysis | Feruloyltyramine |

**Table S3. Potential targets of each herb in Jin-Gu-Lian capsules**

| **Herbs** | **Gene Symbol** | **Herbs** | **Gene Symbol** |
| --- | --- | --- | --- |
| *Alangium chinense* | TNNC1 | *Alangium chinense* | HSD17B1 |
| *Alangium chinense* | AADAT | *Alangium chinense* | HTR1A |
| *Alangium chinense* | AOC1 | *Alangium chinense* | HTR7 |
| *Alangium chinense* | APH1A | *Alangium chinense* | ITGA2B |
| *Alangium chinense* | APH1B | *Alangium chinense* | ITGB3 |
| *Alangium chinense* | C3AR1 | *Alangium chinense* | JAK1 |
| *Alangium chinense* | CASR | *Alangium chinense* | JAK3 |
| *Alangium chinense* | CCR2 | *Alangium chinense* | KDM1A |
| *Alangium chinense* | CHKA | *Alangium chinense* | MC1R |
| *Alangium chinense* | CHRNA1 | *Alangium chinense* | MC3R |
| *Alangium chinense* | CHRNA6 | *Alangium chinense* | MC4R |
| *Alangium chinense* | CHRNB1 | *Alangium chinense* | MC5R |
| *Alangium chinense* | CHRNB2 | *Alangium chinense* | MCHR1 |
| *Alangium chinense* | CHRNB3 | *Alangium chinense* | NAMPT |
| *Alangium chinense* | CHRNB4 | *Alangium chinense* | NCSTN |
| *Alangium chinense* | CHRND | *Alangium chinense* | NISCH |
| *Alangium chinense* | CHRNG | *Alangium chinense* | NPEPPS |
| *Alangium chinense* | CNR1 | *Alangium chinense* | OPRD1 |
| *Alangium chinense* | CNR2 | *Alangium chinense* | OPRK1 |
| *Alangium chinense* | CTSC | *Alangium chinense* | OPRL1 |
| *Alangium chinense* | CTSD | *Alangium chinense* | P2RX7 |
| *Alangium chinense* | CXCR4 | *Alangium chinense* | PLD1 |
| *Alangium chinense* | CYP11B2 | *Alangium chinense* | PSEN1 |
| *Alangium chinense* | CYP2C19 | *Alangium chinense* | PSEN2 |
| *Alangium chinense* | DPP4 | *Alangium chinense* | PSENEN |
| *Alangium chinense* | DPP8 | *Alangium chinense* | PTAFR |
| *Alangium chinense* | DPP9 | *Alangium chinense* | RBP4 |
| *Alangium chinense* | DRD3 | *Alangium chinense* | ROCK1 |
| *Alangium chinense* | EBP | *Alangium chinense* | ROCK2 |
| *Alangium chinense* | EPHX1 | *Alangium chinense* | SI |
| *Alangium chinense* | EPHX2 | *Alangium chinense* | SLC18A2 |
| *Alangium chinense* | F11 | *Alangium chinense* | SLC18A3 |
| *Alangium chinense* | FAAH | *Alangium chinense* | TBXAS1 |
| *Alangium chinense* | FDFT1 | *Alangium chinense* | TNKS2 |
| *Alangium chinense* | HDAC1 | *Alangium chinense* | TNNT2 |
| *Alangium chinense* | HRH1 | *Alangium chinense, Gaultheria leucocarpa var. yunnanensis* | ADORA2A |
| *Alangium chinense, Gaultheria leucocarpa var. yunnanensis, Psammosilene tunicoides, Sargentodoxa cuneata* | PTGS1 | *Alangium chinense,Psammosilene tunicoides* | HDAC4 |
| *Alangium chinense, Gaultheria leucocarpa var. yunnanensis,Psammosilene tunicoides* | ACHE | *Alangium chinense,Psammosilene tunicoides* | HRH3 |
| *Alangium chinense, Gaultheria leucocarpa var. yunnanensis,Psammosilene tunicoides* | AKR1B1 | *Alangium chinense,Psammosilene tunicoides* | HRH4 |
| *Alangium chinense, Gaultheria leucocarpa var. yunnanensis,Psammosilene tunicoides* | ALOX5 | *Alangium chinense,Psammosilene tunicoides* | HTR2C |
| *Alangium chinense, Gaultheria leucocarpa var. yunnanensis,Psammosilene tunicoides,Sargentodoxa cuneata* | PTGS2 | *Alangium chinense,Psammosilene tunicoides* | JAK2 |
| *Alangium chinense, Psammosilene tunicoides* | AHR | *Alangium chinense,Psammosilene tunicoides* | PNMT |
| *Alangium chinense, Psammosilene tunicoides* | BCL2A1 | *Alangium chinense,Psammosilene tunicoides* | SIGMAR1 |
| *Alangium chinense, Psammosilene tunicoides* | MIF | *Alangium chinense,Psammosilene tunicoides* | TAAR1 |
| *Alangium chinense, Psammosilene tunicoides* | NR3C1 | *Alangium chinense,Psammosilene tunicoides,Sargentodoxa cuneata* | CHRM1 |
| *Alangium chinense, Psammosilene tunicoides* | TLR9 | *Alangium chinense,Psammosilene tunicoides,Sargentodoxa cuneata* | CHRM2 |
| *Alangium chinense,Gaultheria leucocarpa var. yunnanensis* | BACE1 | *Alangium chinense,Psammosilene tunicoides,Sargentodoxa cuneata* | CHRM4 |
| *Alangium chinense,Gaultheria leucocarpa var. yunnanensis* | DRD4 | *Alangium chinense,Psammosilene tunicoides,Sargentodoxa cuneata* | MAOB |
| *Alangium chinense,Gaultheria leucocarpa var. yunnanensis,Psammosilene tunicoides* | CYP19A1 | *Alangium chinense,Psammosilene tunicoides,Sargentodoxa cuneata* | SLC6A2 |
| *Alangium chinense,Gaultheria leucocarpa var. yunnanensis,Psammosilene tunicoides,Sargentodoxa cuneata* | MAOA | *Alangium chinense,Psammosilene tunicoides,Sargentodoxa cuneata* | SLC6A3 |
| *Alangium chinense,Heptapleurum leucanthum,Psammosilene tunicoides* | CHRNA7 | *Alangium chinense,Sargentodoxa cuneata* | SLC6A4 |
| *Alangium chinense,Psammosilene tunicoides* | ANPEP | *Alangium chinense,Sargentodoxa cuneata* | CHRM3 |
| *Alangium chinense,Psammosilene tunicoides* | CHRM5 | *Alangium chinense,Sargentodoxa cuneata* | CHRNA2 |
| *Alangium chinense,Psammosilene tunicoides* | CHRNA4 | *Alangium chinense,Sargentodoxa cuneata* | HTR2A |
| *Alangium chinense,Psammosilene tunicoides* | CYP17A1 | *Alangium chinense,Sargentodoxa cuneata* | MGAM |
| *Alangium chinense,Psammosilene tunicoides* | DRD2 | *Alangium chinense,Sargentodoxa cuneata* | OPRM1 |
| *Alangium chinense,Psammosilene tunicoides* | DRD5 | *Gaultheria leucocarpa var. yunnanensis* | TRPV1 |
| *Gaultheria leucocarpa var. yunnanensis* | ABCC1 | *Gaultheria leucocarpa var. yunnanensis* | PLK1 |
| *Gaultheria leucocarpa var. yunnanensis* | ADORA1 | *Gaultheria leucocarpa var. yunnanensis* | POLA1 |
| *Gaultheria leucocarpa var. yunnanensis* | AKR1A1 | *Gaultheria leucocarpa var. yunnanensis* | PTK2 |
| *Gaultheria leucocarpa var. yunnanensis* | AKR1C1 | *Gaultheria leucocarpa var. yunnanensis* | PTPRC |
| *Gaultheria leucocarpa var. yunnanensis* | AKR1C2 | *Gaultheria leucocarpa var. yunnanensis* | PTPRS |
| *Gaultheria leucocarpa var. yunnanensis* | AKR1C3 | *Gaultheria leucocarpa var. yunnanensis* | PYGL |
| *Gaultheria leucocarpa var. yunnanensis* | AKR1C4 | *Gaultheria leucocarpa var. yunnanensis* | RFK |
| *Gaultheria leucocarpa var. yunnanensis* | AKT1 | *Gaultheria leucocarpa var. yunnanensis* | RIBC1 |
| *Gaultheria leucocarpa var. yunnanensis* | ALK | *Gaultheria leucocarpa var. yunnanensis* | RPS6KA3 |
| *Gaultheria leucocarpa var. yunnanensis* | ALOX12 | *Gaultheria leucocarpa var. yunnanensis* | SLC22A11 |
| *Gaultheria leucocarpa var. yunnanensis* | APEX1 | *Gaultheria leucocarpa var. yunnanensis* | SLC22A12 |
| *Gaultheria leucocarpa var. yunnanensis* | APOB | *Gaultheria leucocarpa var. yunnanensis* | SLC22A2 |
| *Gaultheria leucocarpa var. yunnanensis* | ARG1 | *Gaultheria leucocarpa var. yunnanensis* | SLC47A1 |
| *Gaultheria leucocarpa var. yunnanensis* | ARPC2 | *Gaultheria leucocarpa var. yunnanensis* | SRC |
| *Gaultheria leucocarpa var. yunnanensis* | AURKB | *Gaultheria leucocarpa var. yunnanensis* | SYK |
| *Gaultheria leucocarpa var. yunnanensis* | AVPR2 | *Gaultheria leucocarpa var. yunnanensis* | TAS2R1 |
| *Gaultheria leucocarpa var. yunnanensis* | AXL | *Gaultheria leucocarpa var. yunnanensis* | TAS2R10 |
| *Gaultheria leucocarpa var. yunnanensis* | BCL6 | *Gaultheria leucocarpa var. yunnanensis* | TAS2R20 |
| *Gaultheria leucocarpa var. yunnanensis* | BDKRB2 | *Gaultheria leucocarpa var. yunnanensis* | TAS2R3 |
| *Gaultheria leucocarpa var. yunnanensis* | CA1 | *Gaultheria leucocarpa var. yunnanensis* | TAS2R30 |
| *Gaultheria leucocarpa var. yunnanensis* | CA3 | *Gaultheria leucocarpa var. yunnanensis* | TAS2R31 |
| *Gaultheria leucocarpa var. yunnanensis* | CACNA1G | *Gaultheria leucocarpa var. yunnanensis* | TAS2R4 |
| *Gaultheria leucocarpa var. yunnanensis* | CAMK2B | *Gaultheria leucocarpa var. yunnanensis* | TAS2R43 |
| *Gaultheria leucocarpa var. yunnanensis* | CCNB1 | *Gaultheria leucocarpa var. yunnanensis* | TAS2R46 |
| *Gaultheria leucocarpa var. yunnanensis* | CCNB2 | *Gaultheria leucocarpa var. yunnanensis* | TAS2R7 |
| *Gaultheria leucocarpa var. yunnanensis* | CCNB3 | *Gaultheria leucocarpa var. yunnanensis* | TMEM30A |
| *Gaultheria leucocarpa var. yunnanensis* | CDK1 | *Gaultheria leucocarpa var. yunnanensis* | TMEM30B |
| *Gaultheria leucocarpa var. yunnanensis* | CDK2 | *Gaultheria leucocarpa var. yunnanensis* | TMEM30C |
| *Gaultheria leucocarpa var. yunnanensis* | CDK5 | *Gaultheria leucocarpa var. yunnanensis* | TMPRSS11D |
| *Gaultheria leucocarpa var. yunnanensis* | CDK5R1 | *Gaultheria leucocarpa var. yunnanensis* | TOP2A |
| *Gaultheria leucocarpa var. yunnanensis* | CDK6 | *Gaultheria leucocarpa var. yunnanensis* | TRPA1 |
| *Gaultheria leucocarpa var. yunnanensis* | CES3 | *Gaultheria leucocarpa var. yunnanensis* | UGT1A10 |
| *Gaultheria leucocarpa var. yunnanensis* | CES4A | *Gaultheria leucocarpa var. yunnanensis* | UGT1A3 |
| *Gaultheria leucocarpa var. yunnanensis* | CES5A | *Gaultheria leucocarpa var. yunnanensis* | UGT1A7 |
| *Gaultheria leucocarpa var. yunnanensis* | CSNK2A1 | *Gaultheria leucocarpa var. yunnanensis* | UGT1A8 |
| *Gaultheria leucocarpa var. yunnanensis* | CXCL1 | *Gaultheria leucocarpa var. yunnanensis* | UGT2B17 |
| *Gaultheria leucocarpa var. yunnanensis* | CXCL2 | *Gaultheria leucocarpa var. yunnanensis, Sargentodoxa cuneata* | PPARG |
| *Gaultheria leucocarpa var. yunnanensis* | CXCL3 | *Gaultheria leucocarpa var. yunnanensis,Heptapleurum leucanthum* | ACP1 |
| *Gaultheria leucocarpa var. yunnanensis* | CXCR1 | *Gaultheria leucocarpa var. yunnanensis,Heptapleurum leucanthum* | AKR1B10 |
| *Gaultheria leucocarpa var. yunnanensis* | CXCR5 | *Gaultheria leucocarpa var. yunnanensis,Heptapleurum leucanthum* | CDC25B |
| *Gaultheria leucocarpa var. yunnanensis* | CYCS | *Gaultheria leucocarpa var. yunnanensis,Heptapleurum leucanthum* | PDE4D |
| *Gaultheria leucocarpa var. yunnanensis* | CYP1B1 | *Gaultheria leucocarpa var. yunnanensis,Heptapleurum leucanthum* | PLA2G1B |
| *Gaultheria leucocarpa var. yunnanensis* | DAPK1 | *Gaultheria leucocarpa var. yunnanensis,Heptapleurum leucanthum* | POLB |
| *Gaultheria leucocarpa var. yunnanensis* | EDNRA | *Gaultheria leucocarpa var. yunnanensis,Heptapleurum leucanthum* | PTPRF |
| *Gaultheria leucocarpa var. yunnanensis* | EDNRB | *Gaultheria leucocarpa var. yunnanensis,Heptapleurum leucanthum* | RORC |
| *Gaultheria leucocarpa var. yunnanensis* | EGFR | *Gaultheria leucocarpa var. yunnanensis,Heptapleurum leucanthum,Psammosilene tunicoides* | HSD11B1 |
| *Gaultheria leucocarpa var. yunnanensis* | ERVFRD-1 | *Gaultheria leucocarpa var. yunnanensis,Heptapleurum leucanthum,Psammosilene tunicoides* | PTPN1 |
| *Gaultheria leucocarpa var. yunnanensis* | ERVW-1 | *Gaultheria leucocarpa var. yunnanensis,Heptapleurum leucanthum,Psammosilene tunicoides* | PTPN2 |
| *Gaultheria leucocarpa var. yunnanensis* | F2 | *Gaultheria leucocarpa var. yunnanensis,Psammosilene tunicoides* | CA2 |
| *Gaultheria leucocarpa var. yunnanensis* | FIP1L1 | *Gaultheria leucocarpa var. yunnanensis,Psammosilene tunicoides* | ABCB1 |
| *Gaultheria leucocarpa var. yunnanensis* | FLT3 | *Gaultheria leucocarpa var. yunnanensis,Psammosilene tunicoides* | ABCG2 |
| *Gaultheria leucocarpa var. yunnanensis* | GLO1 | *Gaultheria leucocarpa var. yunnanensis,Psammosilene tunicoides* | CA12 |
| *Gaultheria leucocarpa var. yunnanensis* | HDAC3 | *Gaultheria leucocarpa var. yunnanensis,Psammosilene tunicoides* | CA13 |
| *Gaultheria leucocarpa var. yunnanensis* | HMOX1 | *Gaultheria leucocarpa var. yunnanensis,Psammosilene tunicoides* | CA14 |
| *Gaultheria leucocarpa var. yunnanensis* | HSD17B2 | *Gaultheria leucocarpa var. yunnanensis,Psammosilene tunicoides* | CA4 |
| *Gaultheria leucocarpa var. yunnanensis* | IDO1 | *Gaultheria leucocarpa var. yunnanensis,Psammosilene tunicoides* | CA5A |
| *Gaultheria leucocarpa var. yunnanensis* | IGF1R | *Gaultheria leucocarpa var. yunnanensis,Psammosilene tunicoides* | CA5B |
| *Gaultheria leucocarpa var. yunnanensis* | INSR | *Gaultheria leucocarpa var. yunnanensis,Psammosilene tunicoides* | CA6 |
| *Gaultheria leucocarpa var. yunnanensis* | KDM4E | *Gaultheria leucocarpa var. yunnanensis,Psammosilene tunicoides* | CA7 |
| *Gaultheria leucocarpa var. yunnanensis* | MAPT | *Gaultheria leucocarpa var. yunnanensis,Psammosilene tunicoides* | CA9 |
| *Gaultheria leucocarpa var. yunnanensis* | MET | *Gaultheria leucocarpa var. yunnanensis,Psammosilene tunicoides* | CACNA1H |
| *Gaultheria leucocarpa var. yunnanensis* | MMP13 | *Gaultheria leucocarpa var. yunnanensis,Psammosilene tunicoides* | CES1 |
| *Gaultheria leucocarpa var. yunnanensis* | MMP3 | *Gaultheria leucocarpa var. yunnanensis,Psammosilene tunicoides* | CES2 |
| *Gaultheria leucocarpa var. yunnanensis* | MPG | *Gaultheria leucocarpa var. yunnanensis,Psammosilene tunicoides* | DNMT1 |
| *Gaultheria leucocarpa var. yunnanensis* | MPO | *Gaultheria leucocarpa var. yunnanensis,Psammosilene tunicoides* | ESR2 |
| *Gaultheria leucocarpa var. yunnanensis* | MYLK | *Gaultheria leucocarpa var. yunnanensis,Psammosilene tunicoides* | GPR35 |
| *Gaultheria leucocarpa var. yunnanensis* | NEK2 | *Gaultheria leucocarpa var. yunnanensis,Psammosilene tunicoides* | GSK3B |
| *Gaultheria leucocarpa var. yunnanensis* | NEK6 | *Gaultheria leucocarpa var. yunnanensis,Psammosilene tunicoides* | PIM1 |
| *Gaultheria leucocarpa var. yunnanensis* | NGFRAP1 | *Gaultheria leucocarpa var. yunnanensis,Psammosilene tunicoides* | XDH |
| *Gaultheria leucocarpa var. yunnanensis* | NOX4 | *Gaultheria leucocarpa var. yunnanensis,Psammosilene tunicoides* | ALOX15 |
| *Gaultheria leucocarpa var. yunnanensis* | NQO2 | *Gaultheria leucocarpa var. yunnanensis,Psammosilene tunicoides,Sargentodoxa cuneata* | ADRA2C |
| *Gaultheria leucocarpa var. yunnanensis* | NR0B1 | *Gaultheria leucocarpa var. yunnanensis,Sargentodoxa cuneata* | CSF2 |
| *Gaultheria leucocarpa var. yunnanensis* | NUAK1 | *Gaultheria leucocarpa var. yunnanensis,Sargentodoxa cuneata* | ESR1 |
| *Gaultheria leucocarpa var. yunnanensis* | ODC1 | *Gaultheria leucocarpa var. yunnanensis,Sargentodoxa cuneata* | KDR |
| *Gaultheria leucocarpa var. yunnanensis* | PIK3CG | *Gaultheria leucocarpa var. yunnanensis,Sargentodoxa cuneata* | MMP2 |
| *Gaultheria leucocarpa var. yunnanensis* | PIK3R1 | *Gaultheria leucocarpa var. yunnanensis,Sargentodoxa cuneata* | PON1 |
| *Gaultheria leucocarpa var. yunnanensis* | PKN1 | *Gaultheria leucocarpa var. yunnanensis,Sargentodoxa cuneata* | TOP2B |
| *Heptapleurum leucanthum* | CD81 | *Heptapleurum leucanthum* | NR1H3 |
| *Heptapleurum leucanthum* | HMGCR | *Heptapleurum leucanthum* | SHBG |
| *Heptapleurum leucanthum* | NPC1L1 | *Psammosilene tunicoides* | ACE |
| *Psammosilene tunicoides* | ALPL | *Psammosilene tunicoides* | NOS1 |
| *Psammosilene tunicoides* | APOBEC3A | *Psammosilene tunicoides* | NOS2 |
| *Psammosilene tunicoides* | APOBEC3G | *Psammosilene tunicoides* | NR2E3 |
| *Psammosilene tunicoides* | APP | *Psammosilene tunicoides* | NR2F2 |
| *Psammosilene tunicoides* | AR | *Psammosilene tunicoides* | PARP1 |
| *Psammosilene tunicoides* | CACNA1B | *Psammosilene tunicoides* | PLIN1 |
| *Psammosilene tunicoides* | CTDSP1 | *Psammosilene tunicoides* | PPO2 |
| *Psammosilene tunicoides* | CYP1A2 | *Psammosilene tunicoides* | RIPK2 |
| *Psammosilene tunicoides* | DUSP3 | *Psammosilene tunicoides* | RORA |
| *Psammosilene tunicoides* | FDPS | *Psammosilene tunicoides* | S1PR2 |
| *Psammosilene tunicoides* | Grin1 | *Psammosilene tunicoides* | S1PR4 |
| *Psammosilene tunicoides* | GRM2 | *Psammosilene tunicoides* | SIRT2 |
| *Psammosilene tunicoides* | GRM4 | *Psammosilene tunicoides* | SLC5A1 |
| *Psammosilene tunicoides* | HCAR2 | *Psammosilene tunicoides* | SLC5A2 |
| *Psammosilene tunicoides* | HDAC6 | *Psammosilene tunicoides* | SRD5A1 |
| *Psammosilene tunicoides* | HSD17B3 | *Psammosilene tunicoides* | SRD5A2 |
| *Psammosilene tunicoides* | HTR1E | *Psammosilene tunicoides* | TUBB2B |
| *Psammosilene tunicoides* | Htr3a | *Psammosilene tunicoides,Sargentodoxa cuneata* | ADRA2A |
| *Psammosilene tunicoides* | HTR5A | *Psammosilene tunicoides,Sargentodoxa cuneata* | ADRA2B |
| *Psammosilene tunicoides* | Htr6 | *Psammosilene tunicoides,Sargentodoxa cuneata* | CASP9 |
| *Psammosilene tunicoides* | LTB4R | *Psammosilene tunicoides,Sargentodoxa cuneata* | NOS3 |
| *Psammosilene tunicoides* | MCL1 | *Psammosilene tunicoides,Sargentodoxa cuneata* | RELA |
| *Psammosilene tunicoides* | MGLL | *Sargentodoxa cuneata* | ACTA2 |
| *Sargentodoxa cuneata* | ADH1C | *Sargentodoxa cuneata* | LACTBL1 |
| *Sargentodoxa cuneata* | ADRA1B | *Sargentodoxa cuneata* | LTA4H |
| *Sargentodoxa cuneata* | ADRA1D | *Sargentodoxa cuneata* | LYZ |
| *Sargentodoxa cuneata* | ADRB1 | *Sargentodoxa cuneata* | MAP2 |
| *Sargentodoxa cuneata* | ADRB2 | *Sargentodoxa cuneata* | MMP1 |
| *Sargentodoxa cuneata* | BAX | *Sargentodoxa cuneata* | IKBKB |
| *Sargentodoxa cuneata* | BTK | *Sargentodoxa cuneata* | NCOA1 |
| *Sargentodoxa cuneata* | CALM2 | *Sargentodoxa cuneata* | NCOA2 |
| *Sargentodoxa cuneata* | CASP8 | *Sargentodoxa cuneata* | NR3C2 |
| *Sargentodoxa cuneata* | CCNA2 | *Sargentodoxa cuneata* | PDE3A |
| *Sargentodoxa cuneata* | CD40 | *Sargentodoxa cuneata* | PGR |
| *Sargentodoxa cuneata* | CDKN1A | *Sargentodoxa cuneata* | PKIA |
| *Sargentodoxa cuneata* | CTRB1 | *Sargentodoxa cuneata* | PLAU |
| *Sargentodoxa cuneata* | CYP1A1 | *Sargentodoxa cuneata* | PRKCA |
| *Sargentodoxa cuneata* | DRD1 | *Sargentodoxa cuneata* | PRKCB |
| *Sargentodoxa cuneata* | EGF | *Sargentodoxa cuneata* | PRKCD |
| *Sargentodoxa cuneata* | F7 | *Sargentodoxa cuneata* | PRKCE |
| *Sargentodoxa cuneata* | FASN | *Sargentodoxa cuneata* | PRKCG |
| *Sargentodoxa cuneata* | FLT1 | *Sargentodoxa cuneata* | PRKCZ |
| *Sargentodoxa cuneata* | FLT4 | *Sargentodoxa cuneata* | PRSS1 |
| *Sargentodoxa cuneata* | GABRA1 | *Sargentodoxa cuneata* | PRSS3 |
| *Sargentodoxa cuneata* | GRIA2 | *Sargentodoxa cuneata* | RXRA |
| *Sargentodoxa cuneata* | HSP90AA1 | *Sargentodoxa cuneata* | SCN5A |
| *Sargentodoxa cuneata* | IL1B | *Sargentodoxa cuneata* | SLC2A1 |
| *Sargentodoxa cuneata* | IRF1 | *Sargentodoxa cuneata* | SLC2A4 |
| *Sargentodoxa cuneata* | JUN | *Sargentodoxa cuneata* | STAT1 |
| *Sargentodoxa cuneata* | KCNH2 | *Sargentodoxa cuneata* | TGFB1 |
| *Sargentodoxa cuneata* | KLF7 | *Sargentodoxa cuneata* | TYRP1 |

**Table S4. List of RA-related genes**

| **Gene Symbol** | **Source** | **Gene Symbol** | **Source** | **Gene Symbol** | **Source** |
| --- | --- | --- | --- | --- | --- |
| ABCB1 | CTD | ACHE | DrugBank | DHFR | CTD;DrugBank |
| ABCC2 | CTD | AKR1B1 | DrugBank | PTGS1 | CTD;DrugBank |
| ABCC3 | CTD | AKR1B10 | DrugBank | PTGS2 | CTD;DrugBank |
| ABCC4 | CTD | AKR1C1 | DrugBank | CD80 | DrugBank;KEGG_PATHWAY |
| ABCC5 | CTD | ALPPL2 | DrugBank | CD86 | DrugBank;KEGG_PATHWAY |
| ABCG2 | CTD | ANXA1 | DrugBank | TNFSF11 | DrugBank;KEGG_PATHWAY |
| ACAN | CTD | ASIC1 | DrugBank | IFNG | DrugBank;KEGG_PATHWAY;CTD |
| ACKR3 | CTD | ATP4A | DrugBank | IL1B | DrugBank;KEGG_PATHWAY;CTD |
| ADIPOQ | CTD | BCL2 | DrugBank | TNF | DrugBank;KEGG_PATHWAY;CTD |
| ADORA2A | CTD | C1QA | DrugBank | ACP5 | KEGG_PATHWAY |
| AGER | CTD | C1QB | DrugBank | ANGPT1 | KEGG_PATHWAY |
| ANXA3 | CTD | C1QC | DrugBank | ATP6AP1 | KEGG_PATHWAY |
| ARID5B | CTD | C1R | DrugBank | ATP6V0A1 | KEGG_PATHWAY |
| B3GNT9 | CTD | C1S | DrugBank | ATP6V0A2 | KEGG_PATHWAY |
| BAIAP2L1 | CTD | CA2 | DrugBank | ATP6V0A4 | KEGG_PATHWAY |
| BCL2A1 | CTD | CA3 | DrugBank | ATP6V0B | KEGG_PATHWAY |
| BDKRB2 | CTD | CASP1 | DrugBank | ATP6V0C | KEGG_PATHWAY |
| BGN | CTD | CASP3 | DrugBank | ATP6V0D1 | KEGG_PATHWAY |
| BMP4 | CTD | CCNA2 | DrugBank | ATP6V0D2 | KEGG_PATHWAY |
| BMP6 | CTD | CCND1 | DrugBank | ATP6V0E1 | KEGG_PATHWAY |
| CALD1 | CTD | CD40 | CTD;DrugBank | ATP6V0E2 | KEGG_PATHWAY |
| CAT | CTD | CDH11 | DrugBank | ATP6V1A | KEGG_PATHWAY |
| CAV2 | CTD | CHRNA3 | DrugBank | ATP6V1B1 | KEGG_PATHWAY |
| CCL8 | CTD | CHUK | DrugBank | ATP6V1B2 | KEGG_PATHWAY |
| CCN1 | CTD | CLCNKA | DrugBank | ATP6V1C1 | KEGG_PATHWAY |
| CCN2 | CTD | CRH | DrugBank | ATP6V1C2 | KEGG_PATHWAY |
| CCR6 | CTD | CXCR1 | DrugBank | ATP6V1D | KEGG_PATHWAY |
| CD2 | CTD | CYP2S1 | DrugBank | ATP6V1E1 | KEGG_PATHWAY |
| CD83 | CTD | DHODH | DrugBank | ATP6V1E2 | KEGG_PATHWAY |
| CDK6 | CTD | EDNRA | DrugBank | ATP6V1F | KEGG_PATHWAY |
| COL2A1 | CTD | FABP2 | DrugBank | ATP6V1G1 | KEGG_PATHWAY |
| CP | CTD | FCGR1A | DrugBank | ATP6V1G2 | KEGG_PATHWAY |
| CRP | CTD | FCGR2A | DrugBank | ATP6V1G3 | KEGG_PATHWAY |
| CTSD | CTD | FCGR2B | DrugBank | ATP6V1H | KEGG_PATHWAY |
| CXCR4 | CTD | FCGR3A | DrugBank | CCL2 | KEGG_PATHWAY |
| CYBB | CTD | FCGR3B | DrugBank | CCL20 | KEGG_PATHWAY |
| DDIT4 | CTD | FKBP1A | DrugBank | CCL3 | KEGG_PATHWAY |
| DDX6 | CTD | GABBR2 | DrugBank | CCL3L1 | KEGG_PATHWAY |
| ENO1 | CTD | GLRA1 | DrugBank | CCL3L3 | KEGG_PATHWAY |
| F2 | CTD | GP1BA | DrugBank | CCL5 | KEGG_PATHWAY |
| FASLG | CTD | GSTA2 | DrugBank | CSF1 | KEGG_PATHWAY |
| FKBP5 | CTD | GSTM1 | DrugBank | CTLA4 | KEGG_PATHWAY |
| FOXP3 | CTD | HAL | DrugBank | CTSK | KEGG_PATHWAY |
| GART | CTD | HARS | DrugBank | CTSL | KEGG_PATHWAY |
| GATA3 | CTD | HDC | DrugBank | CXCL1 | KEGG_PATHWAY |
| GC | CTD | HELB | DrugBank | CXCL12 | KEGG_PATHWAY |
| GGH | CTD | HMGB1 | DrugBank | CXCL3 | KEGG_PATHWAY |
| GPRC5A | CTD | HPGDS | DrugBank | CXCL5 | KEGG_PATHWAY |
| GRK6 | CTD | HPRT1 | DrugBank | FLT1 | KEGG_PATHWAY |
| GSDME | CTD | HRH2 | DrugBank | FOS | KEGG_PATHWAY |
| HCLS1 | CTD | HSD11B2 | DrugBank | HLA-DMA | KEGG_PATHWAY |
| HDAC1 | CTD | HSPA5 | DrugBank | HLA-DMB | KEGG_PATHWAY |
| HSD11B1 | CTD | IKBKB | DrugBank | HLA-DOA | KEGG_PATHWAY |
| IGFBP3 | CTD | IL1R1 | DrugBank | HLA-DOB | KEGG_PATHWAY |
| IL1RN | CTD | KCNQ2 | DrugBank | HLA-DPA1 | KEGG_PATHWAY |
| IL2RA | CTD | KCNQ3 | DrugBank | HLA-DPB1 | KEGG_PATHWAY |
| IL6R | CTD | LTA | DrugBank | HLA-DQA1 | KEGG_PATHWAY |
| IL6ST | CTD | MAPK3 | DrugBank | HLA-DQA2 | KEGG_PATHWAY |
| IRAK1 | CTD | MC2R | DrugBank | HLA-DQB1 | KEGG_PATHWAY |
| ITGA6 | CTD | MMP9 | DrugBank | HLA-DRA | KEGG_PATHWAY |
| LCN2 | CTD | MYC | DrugBank | HLA-DRB3 | KEGG_PATHWAY |
| LHX2 | CTD | NEU1 | DrugBank | HLA-DRB4 | KEGG_PATHWAY |
| LY96 | CTD | NFKB2 | DrugBank | HLA-DRB5 | KEGG_PATHWAY |
| MARCKS | CTD | NFKBIA | DrugBank | ICAM1 | KEGG_PATHWAY |
| MMP10 | CTD | NOS2 | DrugBank | IGH | KEGG_PATHWAY |
| MMP12 | CTD | NR0B1 | DrugBank | IL11 | KEGG_PATHWAY |
| MMP2 | CTD | NR1I2 | DrugBank | IL15 | KEGG_PATHWAY |
| MPO | CTD | NR3C1 | DrugBank | IL17A | KEGG_PATHWAY |
| MTHFR | CTD | PCNA | DrugBank | IL1A | KEGG_PATHWAY |
| NCF1 | CTD | PDPK1 | DrugBank | IRF5 | KEGG_PATHWAY |
| NCF2 | CTD | PLA2G1B | DrugBank | ITGAL | KEGG_PATHWAY |
| NDUFA4L2 | CTD | PLA2G2A | DrugBank | ITGB2 | KEGG_PATHWAY |
| NFKBIE | CTD | PLA2G4A | DrugBank | JUN | KEGG_PATHWAY |
| NR4A3 | CTD | PPARA | DrugBank | LTB | KEGG_PATHWAY |
| PLEK | CTD | PPARD | DrugBank | MMP1 | KEGG_PATHWAY |
| PON1 | CTD | PPARG | DrugBank | MMP3 | KEGG_PATHWAY |
| PRKCQ | CTD | PRDX5 | DrugBank | PTH | KEGG_PATHWAY |
| PTK2 | CTD | PRKAG2 | DrugBank | TCIRG1 | KEGG_PATHWAY |
| PTPRC | CTD | PTGDR2 | DrugBank | TEK | KEGG_PATHWAY |
| RAB8A | CTD | PTGER1 | DrugBank | TGFB1 | KEGG_PATHWAY |
| RAP2A | CTD | PTGES3 | DrugBank | TGFB2 | KEGG_PATHWAY |
| RASGRP1 | CTD | PTGIS | DrugBank | TGFB3 | KEGG_PATHWAY |
| RCAN1 | CTD | PTK2B | DrugBank | TLR4 | KEGG_PATHWAY |
| REL | CTD | RELA | DrugBank | TNFRSF11A | KEGG_PATHWAY |
| RUNX1 | CTD | RAB11B | DrugBank | TNFSF13 | KEGG_PATHWAY |
| RUNX2 | CTD | RAC1 | DrugBank | TNFSF13B | KEGG_PATHWAY |
| SMS | CTD | RPS6KA3 | DrugBank | CSF2 | KEGG_PATHWAY;CTD |
| SOD2 | CTD | S100A7 | DrugBank | CXCL2 | KEGG_PATHWAY;CTD |
| STAT1 | CTD | SCN10A | DrugBank | CXCL6 | KEGG_PATHWAY;CTD |
| STAT4 | CTD | SCN4A | DrugBank | CXCL8 | KEGG_PATHWAY;CTD |
| STS | CTD | SLC38A3 | DrugBank | HLA-DRB1 | KEGG_PATHWAY;CTD |
| TFPI2 | CTD | SLC7A11 | DrugBank | IL18 | KEGG_PATHWAY;CTD |
| TLE3 | CTD | THBD | DrugBank | IL23A | KEGG_PATHWAY;CTD |
| TMPO | CTD | TLR7 | DrugBank | TLR2 | KEGG_PATHWAY;CTD |
| TNFAIP2 | CTD | TLR9 | DrugBank | VEGFA | KEGG_PATHWAY;CTD |
| TNFAIP3 | CTD | TNFAIP6 | DrugBank | CD244 | KEGG_PATHWAY;OMIM |
| TNFRSF11B | CTD | TNFRSF1B | DrugBank | CD28 | KEGG_PATHWAY;OMIM |
| TNFRSF14 | CTD | TP53 | DrugBank | CIITA | KEGG_PATHWAY;OMIM |
| TNFSF14 | CTD | TRPV1 | DrugBank | NFKBIL1 | KEGG_PATHWAY;OMIM |
| TRAF1 | CTD | TYMS | DrugBank | PTPN22 | KEGG_PATHWAY;OMIM |
| TRAF6 | CTD | UGT1A9 | DrugBank | IL6 | KEGG_PATHWAY;OMIM;CTD |
| TXNIP | CTD | VDR | DrugBank | SLC22A4 | KEGG_PATHWAY;OMIM;CTD |
| TYK2 | CTD | AHR | CTD;DrugBank | NLRP1 | OMIM |
| ACAT1 | DrugBank | ALOX5 | CTD;DrugBank | IL10 | OMIM;CTD;KEGG_PATHWAY |
| ACE2 | DrugBank | ATIC | CTD;DrugBank | MIF | OMIM;CTD;KEGG_PATHWAY |

**Table S5. Topology parameters of herbs and compounds in the "herbs-compounds-RA- targets" network.**

| **No.** | **Name** | **Degree** | **Average Shortest Path Length** | **Betweenness Centrality** | **Closeness Centrality** | **Eccentricity** | **Neighborhood Connectivity** | **type** |
| --- | --- | --- | --- | --- | --- | --- | --- | --- |
| 1 | quercetin | 20 | 2.51 | 0.14 | 0.40 | 5 | 5.75 | compound |
| 2 | myricetin | 17 | 2.57 | 0.09 | 0.39 | 5 | 6.47 | compound |
| 3 | salidroside | 16 | 2.51 | 0.09 | 0.40 | 5 | 10.69 | compound |
| 4 | anabasine | 14 | 2.69 | 0.07 | 0.37 | 5 | 10.29 | compound |
| 5 | fumaric acid | 12 | 2.65 | 0.04 | 0.38 | 5 | 11.92 | compound |
| 6 | protocatechuic acid | 12 | 2.46 | 0.09 | 0.41 | 4 | 12.33 | compound |
| 7 | emodin | 10 | 3.30 | 0.08 | 0.30 | 5 | 5.80 | compound |
| 8 | 2-coniferylglycerol ethe | 10 | 2.79 | 0.05 | 0.36 | 5 | 13.40 | compound |
| 9 | 7-Hydroxycadalene | 10 | 2.79 | 0.02 | 0.36 | 5 | 14.60 | compound |
| 10 | 2,7-dihydroxycadalene | 9 | 2.83 | 0.02 | 0.35 | 5 | 14.56 | compound |
| 11 | kaempferol | 9 | 2.63 | 0.08 | 0.38 | 5 | 9.11 | compound |
| 12 | venoterpine | 8 | 3.03 | 0.02 | 0.33 | 5 | 13.25 | compound |
| 13 | (-)-catechin | 8 | 2.70 | 0.05 | 0.37 | 5 | 10.88 | compound |
| 14 | 2,7-Dihydroxy-4-isopropyl-6-methylnaphthalene-1-carboxylic acid methyl ester | 7 | 2.97 | 0.01 | 0.34 | 5 | 14.14 | compound |
| 15 | β-sitosterol | 6 | 3.37 | 0.02 | 0.30 | 5 | 8.50 | compound |
| 16 | (5S, 8R)-2-hydroxy-3,8- dimethyl-5-vinyl-5,6,7,8-tetrahydronaphthalene-1,4-dione | 6 | 3.00 | 0.00 | 0.33 | 5 | 16.17 | compound |
| 17 | GL | 20 | 2.43 | 0.29 | 0.41 | 5 | 5.55 | herb |
| 18 | AC | 18 | 3.19 | 0.05 | 0.31 | 6 | 5.28 | herb |
| 19 | SC | 10 | 2.88 | 0.05 | 0.35 | 5 | 6.60 | herb |
| 20 | PT | 8 | 3.37 | 0.06 | 0.30 | 6 | 3.38 | herb |
| 21 | HL | 7 | 3.14 | 0.02 | 0.32 | 5 | 6.29 | herb |

**Table S6. Detailed information about the top 15 KEGG pathways**

| **No.** | **Pathway ID** | **Pathway Name** | **Count** | **Pop Hits** | **P-value** | **Genes** |
| --- | --- | --- | --- | --- | --- | --- |
| 1 | hsa04657 | IL-17 signaling pathway | 11 | 94 | 1.08782E-10 | IKBKB, JUN, CSF2, MMP1, IL1B, MMP3, CXCL1, CXCL3, PTGS2, CXCL2, RELA |
| 2 | hsa05323 | Rheumatoid arthritis | 10 | 93 | 2.40859E-09 | JUN, TGFB1, FLT1, CSF2, MMP1, IL1B, MMP3, CXCL1, CXCL3, CXCL2 |
| 3 | hsa04668 | TNF signaling pathway | 10 | 114 | 1.48187E-08 | IKBKB, JUN, MMP1, IL1B, MMP3, CXCL1, CXCL3, PTGS2, CXCL2, RELA |
| 4 | hsa05417 | Lipid and atherosclerosis | 12 | 215 | 2.9801E-08 | IKBKB, JUN, CD40, MMP1, IL1B, MMP3, CXCL1, PPARG, CXCL3, CXCL2, RELA, PTK2 |
| 5 | hsa05146: | Amoebiasis | 9 | 102 | 1.06918E-07 | TGFB1, CSF2, NOS2, IL1B, CXCL1, CXCL3, CXCL2, RELA, PTK2 |
| 6 | hsa04064 | NF-kappa B signaling pathway | 9 | 104 | 1.24486E-07 | IKBKB, CD40, BCL2A1, IL1B, CXCL1, CXCL3, PTGS2, CXCL2, RELA |
| 7 | hsa05167 | Kaposi sarcoma-associated herpesvirus infection | 10 | 194 | 1.43443E-06 | IKBKB, JUN, CSF2, CDK6, STAT1, CXCL1, CXCL3, PTGS2, CXCL2, RELA |
| 8 | hsa04062 | Chemokine signaling pathway | 9 | 192 | 1.29762E-05 | IKBKB, CXCR1, STAT1, CXCR4, CXCL1, CXCL3, CXCL2, RELA, PTK2 |
| 9 | hsa04620 | Toll-like receptor signaling pathway | 7 | 108 | 3.49238E-05 | IKBKB, JUN, CD40, STAT1, IL1B, TLR9, RELA |
| 10 | hsa04659 | Th17 cell differentiation | 7 | 108 | 3.49238E-05 | IKBKB, JUN, TGFB1, STAT1, IL1B, AHR, RELA |
| 11 | hsa04621 | NOD-like receptor signaling pathway | 8 | 186 | 9.08701E-05 | IKBKB, JUN, STAT1, IL1B, CXCL1, CXCL3, CXCL2, RELA |
| 12 | hsa04380 | Osteoclast differentiation | 7 | 135 | 0.000121716 | IKBKB, JUN, TGFB1, STAT1, IL1B, PPARG, RELA |
| 13 | hsa04060 | Cytokine-cytokine receptor interaction | 9 | 297 | 0.000282303 | CD40, TGFB1, CSF2, CXCR1, IL1B, CXCR4, CXCL1, CXCL3, CXCL2 |
| 14 | hsa04625 | C-type lectin receptor signaling pathway | 6 | 104 | 0.00032539 | IKBKB, JUN, STAT1, IL1B, PTGS2, RELA |
| 15 | hsa04658 | Th1 and Th2 cell differentiation | 4 | 92 | 0.016232562 | IKBKB, JUN, STAT1, RELA |


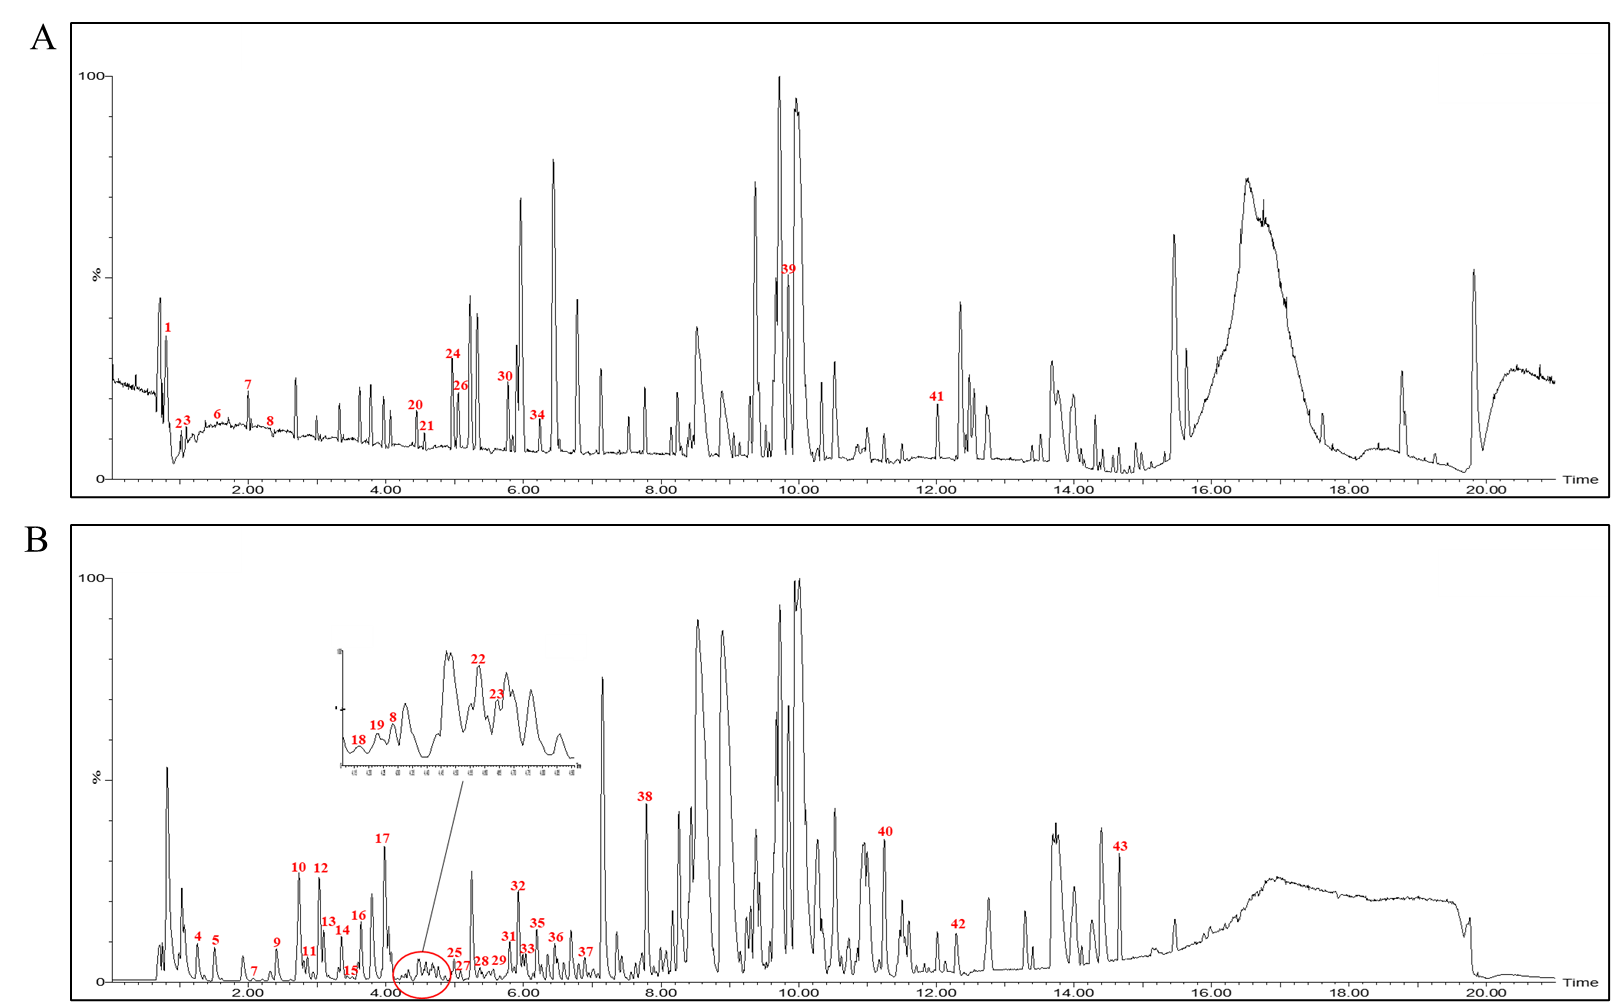
**Supplementary Figures**

Figure S1. Base peak intensity (BPI) chromatograms for Jin-Gu-Lian formula (JGL) by ultra-performance liquid chromatography-quadrupole-time-of-flight tandem mass (UPLC-Q-TOF-MS). (A) BPI chromatogram of the positive (ESI+) ionization modes for JGL; (B) BPI chromatogram of the negative (ESI−) ionization modes for JGL.

**
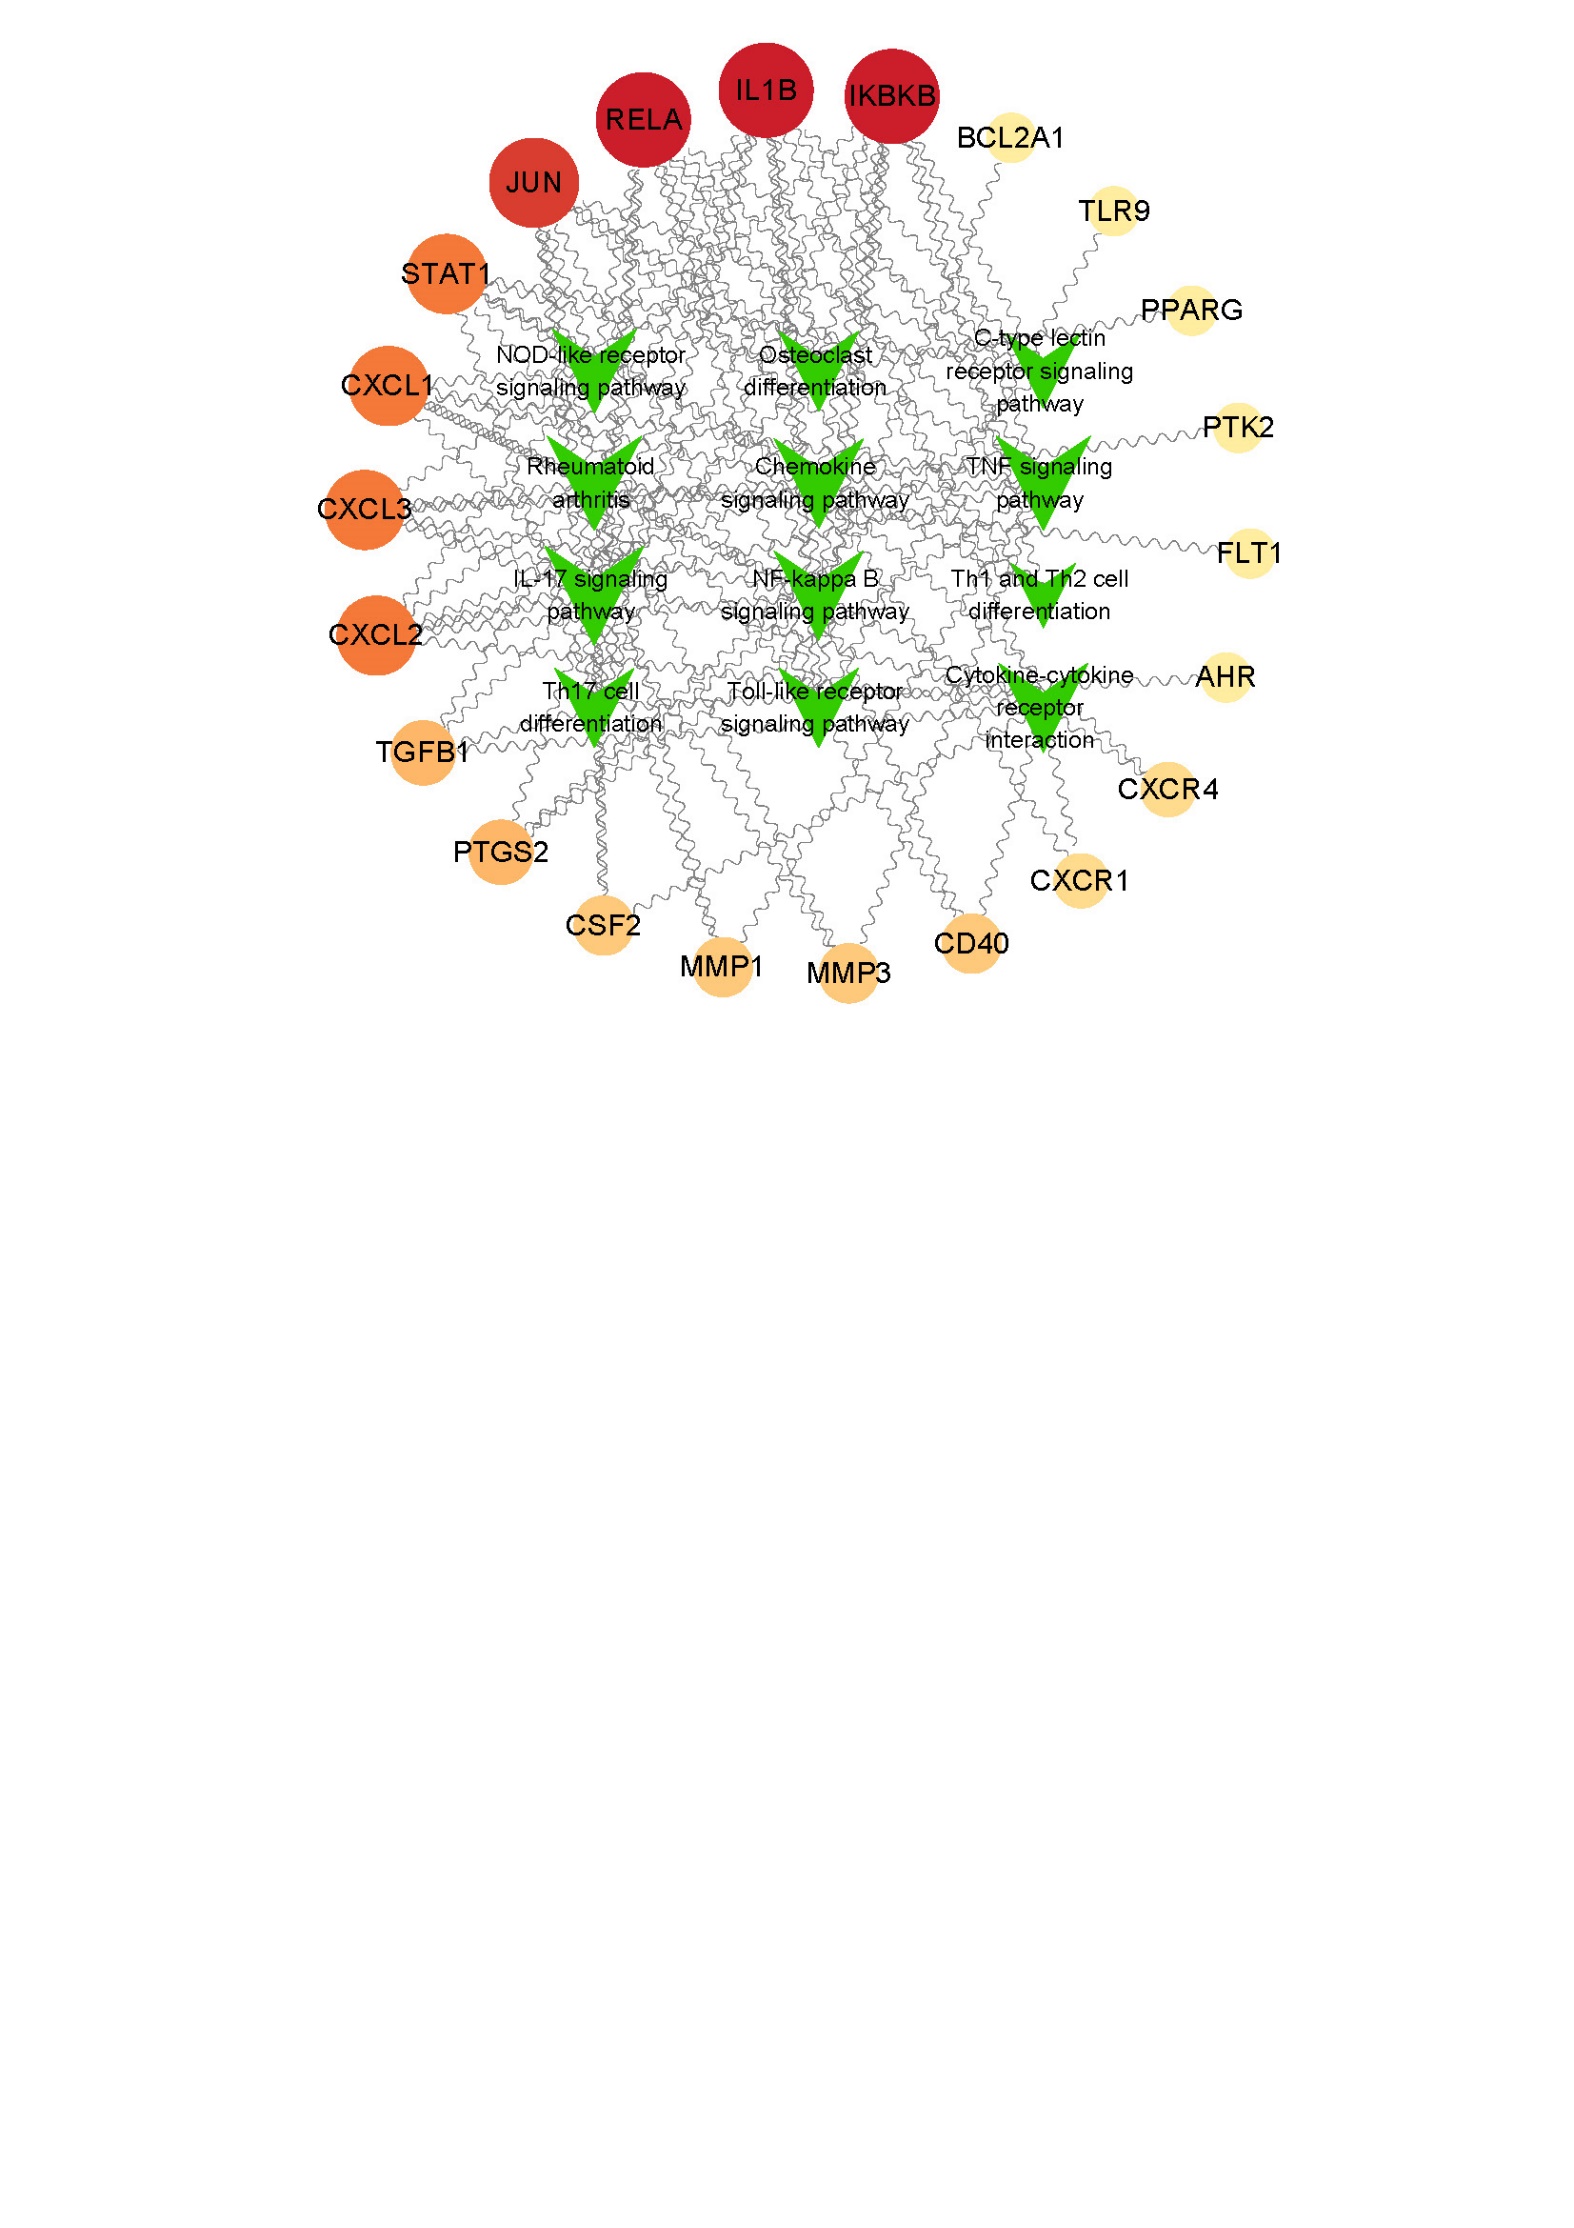
**

Figure S2. The network between the interaction of JGL therapeutic targetsand RA-related KEGG pathways. The green arrow represented RA-related pathway in the top 15 KEGG pathways, and the round represented target. The color and size of the target nodes was based on degree. The degree value from large to small followed a continuous mapping from red to yellow.
